# Supplementary material for: Effect of Peony (Paeonia ostii) Seed Meal Supplement on Enzyme Activities and Flavor Compounds of Chinese Traditional Soybean Paste during Fermentation
Source: MDPI journal article supplement (doi:10.3390/foods12173184), 2023-08-24
Supplement: s1 [file s1]

Table S1. The quantitative and qualitative results of volatile flavor compounds in SH and PH samples

| CAS<br>number | Flavor compound                | Oodor<br>threshold<br>(μg/kg) <sup>1</sup> | Aroma<br>descriptors <sup>2</sup> | Concentration(μg/kg) |                | OAVs      |            |
|---------------|--------------------------------|--------------------------------------------|-----------------------------------|----------------------|----------------|-----------|------------|
|               |                                |                                            |                                   | SH                   | PH             | SH        | PH         |
| Aldehydes     |                                |                                            |                                   |                      |                |           |            |
| 124-19-6      | Nonanal                        | 1.1                                        | rose, orange                      | 5.20±0.93            | - <sup>3</sup> | 4.728654  | -          |
| 590-86-3      | 3-Methylbutanal                | 1.1                                        | chocolate, fatty                  | -                    | 266.08±49.37   | -         | 241.888330 |
| 597-31-9      | 3-Hydroxy-2,2-dimethylpropanal | -                                          | -                                 | 0.75±0.10            | -              | -         | -          |
| 66-25-1       | Hexanal                        | 5                                          | grass, leafy                      | 2.16±0.09            | 9.12±1.07      | 6.758144  | 1.824060   |
| 98-01-1       | Furfural                       | 770                                        | baked bread                       | -                    | 4.29±1.39      | -         | 0.005567   |
| Subtotal      |                                |                                            |                                   | 8.11                 | 279.49         | -         | -          |
| Ketones       |                                |                                            |                                   |                      |                |           |            |
| 123-19-3      | 4-Heptanone                    | 8.2                                        | cheese                            | -                    | 18.31±3.52     | -         | 2.233508   |
| 15726-15-5    | 3-Methyl-4-heptanone           | 0.05                                       | -                                 | -                    | 7.88±0.20      | -         | 157.764343 |
| 19550-10-8    | 3,4-Dimethyl-2-hexanone        | -                                          | -                                 | -                    | 2.95±1.24      | -         | -          |
| 5857-36-3     | 2,2,4-Trimethyl-3-Pentanone    | -                                          | -                                 | -                    | 4.04±1.95      | -         | -          |
| 2918-13-0     | 1-Hepten-3-one                 | 0.04                                       | -                                 | 0.92±0.06            | -              | 23.053997 | -          |
| Subtotal      |                                |                                            |                                   | 0.92                 | 33.18          |           |            |
| Alcohols      |                                |                                            |                                   |                      |                |           |            |
| 104-76-7      | 2-Ethyl-1-hexanol              | 198                                        | -                                 | 1.41±0.22            | 7.30±1.18      | -         | 0.036869   |
| 108-93-0      | Cyclohexanol                   | 160000                                     | -                                 | 0.44±0.08            | -              | 0.000003  | -          |
| 111-27-3      | 1-Hexanol                      | 391                                        | sweet,alcoolic                    | 0.31±0.05            | -              | 0.000804  | -          |
| 111-70-6      | 1-Heptanol                     | 5.4                                        | leafy, herbal                     | 20.40±0.08           | -              | 3.777015  | -          |
| 111-87-5      | 1-Octanol                      | 100                                        | rose, mushroom                    | 3.77±0.91            | 6.03±1.25      | 0.060311  | 0.089646   |
| 112-42-5      | 1-Undecanol                    | 86                                         | -                                 | -                    | 68.18±4.58     | -         | 0.792767   |

|            |                           |        |                   |              |              |           |           |
|------------|---------------------------|--------|-------------------|--------------|--------------|-----------|-----------|
| 123-51-3   | 3-Methyl-1-Butanol        | 4      | whiskey, banana   | 23.34±1.63   | 75.07±7.44   | 3.826459  | 18.768048 |
| 13231-81-7 | 3-Methyl-1-hexanol        | -      | -                 | 0.35±0.09    | -            | -         | -         |
| 18409-17-1 | 2-Octen-1-ol              | 100    | cirrus, vegetable | 1.14±0.07    | -            | 0.011415  | -         |
| 24070-77-7 | 2-Methylcyclopentanol     | -      | -                 | -            | 5.13±1.02    | -         | -         |
| 2919-23-5  | Cyclobutanol              | 4600   | -                 | -            | 4.38±2.40    | -         | 0.000952  |
| 3391-86-4  | 1-Octen-3-ol              | 1.5    | mushroom          | 18.09±1.95   | -            | 12.061223 | -         |
| 35854-86-5 | (Z)-6-Nonen-1-ol          | 1      | honeysuckle       | 0.47±0.09    | -            | 0.470918  | -         |
| 4435-50-1  | 1,2,3-Butanetriol         | -      | -                 | -            | 6.66±0.94    | -         | -         |
| 4798-44-1  | 1-Hexen-3-ol              | 500    | vinegar           | -            | 23.17±4.03   | -         | 0.046331  |
| 50639-00-4 | 2-Ethylhex-2-enol         | -      | -                 | -            | 6.84±0.52    | -         | -         |
| 584-02-1   | 3-Pentanol                | 4125   | herbal            | 1.26±0.21    | -            | 0.000306  | -         |
| 918-85-4   | 3-Methyl-1-penten-3-ol    | -      | -                 | -            | 2.08±1.28    | -         | -         |
| Subtotal   |                           |        |                   | 70.99        | 204.84       |           |           |
|            | Acids                     |        |                   |              |              |           |           |
| 1070-83-3  | 3,3-Dimethylbutyric acid  | 920    | -                 | -            | 2.82±0.09    | -         | 0.003060  |
| 142-62-1   | Hexanoic acid             | 35.6   | sour, cheese      | 0.36±0.06    | -            | 0.009972  | -         |
| 149-57-5   | 2-Ethylhexanoic acid      | 27000  | -                 | 27.32±2.76   | 41.31±15.03  | 0.001012  | 0.001530  |
| 334-48-5   | Decanoic acid             | 130    | fatty             | 0.54±0.12    | -            | 0.004150  | -         |
| 503-74-2   | 3-Methylbutanoic acid     | 12     | cheese            | 117.90±21.21 | 38.53±0.07   | 9.825023  | 3.211118  |
| 541-47-9   | 3-Methyl-2-butenolic acid | 14000  | -                 | 0.64±0.08    | -            | 0.000046  | -         |
| 57-10-3    | Hexadecanoic acid         | 1100   | waxy              | 43.71±2.71   | 216.55±37.30 | 0.004371  | 0.196868  |
| 64-19-7    | Acetic acid               | 180000 | vinegar           | 11.70±9.23   | 44.01±4.01   | 0.000065  | 0.000245  |
| 79-31-2    | 2-Methylpropanoic acid    | 29000  | cheese, buttery   | 8.06±1.94    | 1.66±0.50    | 0.000278  | 0.000057  |
| Subtotal   |                           |        |                   | 210.23       | 408.93       |           |           |
|            | Esters                    |        |                   |              |              |           |           |

|            |                                       |       |                      |            |            |           |            |
|------------|---------------------------------------|-------|----------------------|------------|------------|-----------|------------|
| 108-05-4   | Ethenyl acetate                       | 1400  | -                    | -          | 6.60±0.72  | -         | 0.004715   |
| 108-64-5   | Ethyl 3-Methylbutanoate               | 0.1   | apple, pineapple     | 2.64±0.23  | 8.24±1.66  | 24.016361 | 82.436851  |
| 110-38-3   | Ethyl decanoate                       | 5     | apple, brandy        | 0.70±0.11  | -          | 0.140680  | -          |
| 111-11-5   | Methyl octanoate                      | 200   | orange, herbal       | 0.29±0.09  | -          | 0.001452  | -          |
| 111-82-0   | Methyl dodecanoate                    | 1.5   | -                    | 0.44±0.04  | -          | -         | 0.291022   |
| 112-39-0   | Methyl hexadecanoate                  | 2000  | waxy                 | 11.17±3.52 | 7.49±0.48  | 0.005585  | 0.003746   |
| 112-63-0   | Methyl linoleate                      | -     | fatty, woody         | 11.38±4.22 | -          | -         | -          |
| 123-92-2   | Isopentyl acetate                     | 0.15  | fruity               | -          | 18.90±6.10 | -         | 125.991063 |
| 1731-84-6  | Methyl nonanoate                      | 40    | pear, wine           | -          | 10.36±3.24 | -         | 0.258899   |
| 1937-62-8  | Elaidic acid methyl ester             | -     | -                    | 3.83±0.39  | -          | -         | -          |
| 2308-38-5  | <i>tert</i> -Butyl butanoate          | -     | -                    | -          | 2.79±0.77  | -         | -          |
| 2432-77-1  | Methyl thiohexanoate                  | 0.3   | nutty,<br>buttermilk | -          | 6.70±0.47  | -         | 22.325428  |
| 2438-20-2  | 2-Methyl butyl propionate             | 28    | -                    | -          | 2.47±0.55  | -         | 0.088193   |
| 2463-02-7  | Methyl11,14-eicosadienoate            | -     | -                    | -          | 7.41±2.32  | -         | -          |
| 27625-35-0 | Isopently 2-methylbutanoate           | 8.6   | blueberry, apple     | 2.06±0.10  | -          | 0.239632  | -          |
| 301-00-8   | Methyl linolenate                     | -     | -                    | 0.53±0.12  | 3.28±0.15  | -         | -          |
| 3050-69-9  | Vinyl hexanoate                       | -     | -                    | 0.95±0.23  | -          | -         | -          |
| 539-82-2   | Ethyl pentanoate                      | 0.3   | apple, pineapple     | 0.66±0.13  | -          | 2.215631  | -          |
| 659-70-1   | Isopentyl 3-methylbutanoate           | 20    | apple,fruity         | 1.54±0.63  | -          | 0.077121  | -          |
| 7452-79-1  | Ethyl 2-methylbutyrate                | 0.06  | green, fruity        | 1.21±0.13  | -          | 20.234830 | -          |
| Subtotal   |                                       |       |                      | 37.41      | 74.24      |           |            |
| Furans     |                                       |       |                      |            |            |           |            |
| 1192-62-7  | 2-Acetylfuran                         | 10000 | almond, cocoa        | -          | 6.90±1.03  | -         | 0.000690   |
| 1927-59-9  | 2- <i>tert</i> -Butoxytetrahydrofuran | -     | -                    | 0.49±0.20  | -          | -         | -          |

|            |                          |          |                     |           |            |          |          |
|------------|--------------------------|----------|---------------------|-----------|------------|----------|----------|
| 3208-16-0  | 2-Ethylfuran             | 8000     | coffee, nutty       | -         | 7.84±0.52  | -        | 0.000980 |
| 3777-69-3  | 2-Pentylfuran            | 5.8      | fruity,beany        | 2.61±0.17 | 48.38±0.35 | 0.449631 | 8.341719 |
| 534-22-5   | 2-Methylfuran            | 200      | chocolate           | -         | 22.04±2.15 | -        | 0.110196 |
| Subtotal   |                          |          |                     | 3.1       | 85.16      |          |          |
| Pyrazines  |                          |          |                     |           |            |          |          |
| 108-50-9   | 2,6-Dimethylpyrazine     | 400      | nutty, coffee       | 5.51±1.08 | 3.45±1.69  | 0.013787 | 0.008621 |
| 123-32-0   | 2,5-Dimethylpyrazine     | 80       | roasted nuts        | 9.90±6.73 | -          | 0.123694 | -        |
| 13925-03-6 | 2-Ethyl-6-methylpyrazine | 40       | camphor,<br>menthol | 1.84±0.30 | -          | 0.045947 | -        |
| 13925-09-2 | 2-Methyl-6-vinylpyrazine | -        | hazelnut            | 6.37±1.92 | 35.72±1.85 | -        | -        |
| 14667-55-1 | Trimethylpyrazine        | 23       | nut, cocoa          | 1.74±0.40 | 5.51±0.84  | 0.075491 | 0.239441 |
| Subtotal   |                          |          |                     | 25.36     | 44.68      |          |          |
| Alkanes    |                          |          |                     |           |            |          |          |
| 15869-96-2 | 4,5-Dimethyloctane       | -        | -                   | -         | 4.84±0.27  | -        | -        |
| 16747-31-2 | 3,3,4-Trimethylhexane    | -        | -                   | -         | 3.73±1.25  | -        | -        |
| 17302-32-8 | Nonane,3,7-dimethyl-     | -        | -                   | -         | 32.06±8.86 | -        | -        |
| 5076-19-7  | 2,3-Epoxy-2-methylbutane | -        | -                   | -         | 2.29±0.72  | -        | -        |
| 61141-72-8 | Dodecane,4,6-dimethyl    | -        | -                   | -         | 23.04±0.63 | -        | -        |
| 629-62-9   | Pentadecane              | 13000000 | waxy                | -         | 65.08±7.38 | -        | 0.000005 |
| 7154-80-5  | 3,3,5-Trimethylheptane   | -        | -                   | -         | 4.21±1.52  | -        | -        |
| 7335-17-3  | 3,5-Dimethyl-4-octanone  | -        | -                   | -         | 8.88±0.93  | -        | -        |
| 75-83-2    | 2,2-Dimethylbutane       | 70000    | -                   | 1.01±0.27 | 2.42±0.32  | 0.000014 | 0.000035 |
| Subtotal   |                          |          |                     | 1.01      | 146.55     |          |          |
| Olefin     |                          |          |                     |           |            |          |          |
| 4316-65-8  | 3,5,5-Trimethyl-1-hexene | -        | hazelnut            | -         | 14.02±0.27 | -        | -        |

|            |                                    |         |                     |              |                |          |           |
|------------|------------------------------------|---------|---------------------|--------------|----------------|----------|-----------|
| Subtotal   |                                    |         |                     |              | 14.02          |          |           |
|            | Aromatic compounds                 |         |                     |              |                |          |           |
| 100-51-6   | Benzyl alcohol                     | 2546.21 | rose                | -            | 9.85±0.89      | -        | 0.003868  |
| 60-12-8    | 2-Phenylethanol                    | 390     | rose                | 15.03±1.91   | 41.99±0.91     | 0.107664 | 0.038538  |
| 101-41-7   | Methyl phenylacetate               | -       | floral, almond      | 6.39±0.69    | -              | -        | -         |
| 103-65-1   | Propylbenzene                      | 177.12  | -                   | 3.53±1.15    | 24.23±0.12     | 0.019903 | 0.136826  |
| 103-82-2   | Phenylacetic acid                  | 12000   | -                   | 1.19±0.27    | -              | 0.000099 | -         |
| 106-42-3   | 1,4-Dimethylbenzene                | 530     | -                   | 4.07±0.72    | 20.47±13.53    | 0.007677 | 0.038630  |
| 108-38-3   | 1,3-Dimethylbenzene                | 1000    | -                   | 14.91±0.67   | 29.34±1.70     | 0.014906 | 0.029341  |
| 108-67-8   | 1,3,5-Trimethylbenzene             | 3       | -                   | 6.01±0.03    | -              | 2.001758 | -         |
| 1138-52-9  | 3,5-Bis( <i>tert</i> -butyl)phenol | -       | -                   | 0.48±0.16    | -              | -        | -         |
| 118-69-4   | 2,6-Dichlorotoluene                | -       | -                   |              | 32.21±16.49    | -        | -         |
| 118-93-3   | 1'-Hydroxyacetophenone             | -       | hawthorn,<br>herbal |              | 11.81±3.52     | -        | -         |
| 122-78-1   | 2-Phenylethanal                    | 6.3     | hyacinth, clover    | 30.84±0.43   | 194.66±22.95   | 4.895550 | 30.897774 |
| 13679-41-9 | 3-Phenylyfuran                     | -       | -                   | 0.49±0.14    | -              | -        | -         |
| 19398-61-9 | 2,5-Dichlorotoluene                | -       | -                   | 85.61±14.08  | 437.23±130.96  | -        | -         |
| 2077-46-5  | 2,3,6-Trichlorotoluene             | -       | -                   | -            | 18.23±1.06     | -        | -         |
| 2142-73-6  | 2',5'-Dimethylacetophenone         | -       | -                   | -            | 97.82±0.83     | -        | -         |
| 21834-92-4 | Cocoa hexenal                      | -       | cocoa               | -            | 38.06±3.28     | -        | -         |
| 25552-17-4 | 1-Phenyl-5-methyl-1-hexanone       | -       | -                   | -            | 2.98±1.09      | -        | -         |
| 28715-26-6 | 4,7-dimethylbenzofuran             | -       | hawthorn            | 2.13±0.88    | 401.98±51.49   | -        | -         |
| 32768-54-0 | 2,3-Dichlorotoluene                | -       | -                   | 156.51±26.68 | 1611.20±108.03 | -        | -         |
| 4411-89-6  | 2-Phenyl-2-butenal                 | -       | beany, honey        | -            | 8.51±1.91      | -        | -         |
| 526-73-8   | 1,2,3-trimethyl-Benzene            | -       | -                   | 6.61±1.52    | 64.65±8.74     | -        | -         |

|            |                         |          |              |            |              |          |          |
|------------|-------------------------|----------|--------------|------------|--------------|----------|----------|
| 611-14-3   | 1-Ethyl-2-methylbenzene | 360      | -            | 18.86±4.20 | 170.97±17.72 | -        | -        |
| 620-14-4   | 3-Eethyltoluene         | 800      | -            | 21.72±0.18 | 150.37±2.98  | 0.027146 | 0.187958 |
| 698-87-3   | Benzylmethylcarbinol    | -        | weak rose    | 0.36±0.07  | -            | -        | -        |
| 7359-72-0  | 2,3,4-Trichlorotoluene  | -        | -            | -          | 33.51±5.08   | -        | -        |
| 95-47-6    | <i>o</i> -Xylene        | 450.23   | geranium     | -          | 17.62±1.20   | -        | 0.039137 |
| 95-63-6    | 1,2,4-Trimethylbenzene  | 260      | -            | -          | 36.20±2.92   | -        | 0.139217 |
| 95-73-8    | 2,4-Dichlorotoluene     | -        | -            | 3.01±0.85  | 48.82±2.66   | -        | -        |
| 98-82-8    | Isopropylbenzene        | 70       | -            | -          | 42.44±4.70   | -        | 0.606350 |
| Subtotal   |                         |          |              | 377.73     | 3545.15      |          |          |
|            | Miscellaneous           |          |              |            |              |          |          |
| 1072-83-9  | 2-Acethylpyrrole        | 58585.25 | nut, cherry  | 1.77±0.32  | 5.48±0.55    | 0.000030 | 0.000087 |
| 557-31-3   | Allyl ethyl ether       | -        | -            | 7.32±1.36  | -            | -        | -        |
| 97-72-3    | Isobutyric anhydride    | -        | -            | 2.05±0.86  | -            | -        | -        |
| 17455-13-9 | 18-Crown-6              | -        | -            | -          | 14.80±0.37   | -        | -        |
| 33100-27-5 | 15-Crown-5              | -        | -            | -          | 6.91±3.01    | -        | -        |
| 17372-78-0 | 3-methylcinnoline       | -        | rose         | -          | 14.02±4.28   | -        | -        |
| 544-01-4   | Isopentyl ether         | -        | rose, citrus | -          | 5.56±0.72    | -        | -        |
| Subtotal   |                         |          |              | 11.14      | 46.77        |          |          |

<sup>1</sup> Obtained by reviewing the literature,

<sup>2</sup> Flavor profile descriptions were obtained from <http://www.thegoodscentscompany.com>; <https://www.chemicalbook.com>,

<sup>3</sup> Marked "-" indicated that not detected or relevant information was not retrieved, the same as below.
